# Supplementary material
Source: PubMed Central journal article supplement (PMC166403)
Supplement: pnas_1431057100_2.pdf [file pnas_1431057100_2.pdf]

*NdeI*

5' CCAACATATGGGCCACCTGCCGAAACCTACGCTCTGGGCTGAACCAGGCTCTGTTATTACCCAAGGGAGTCC 3'

5' GTTTTCTTTTACGATACAAACGGTACTCCTGTGTTTCTTGGCCACCCTGACAGCGCAGGGTGACCGGACTCCCTTGGGTAATAAC 3'

5' CGTTTGTATCGTGAAAAGAAAACGGCGCCGTGGATTACTCGCATCCCACAGGAACTTGTTAAAAAGGGCCAGTTTCCGATTCCATC 3'

5' CCTGCAGTATCGCTACCATAGTAACAGCGATAACGCCCTGCATGTTCCAGGTGATGGATGGAATCGGAAACTGGCC 3'

5' CTATGGTAGCGATACTGCAGGCCGCGAGAGCAGCGACCCGCTGGAACTGGTAGTGACGGGAGCCTACATTAAACCGACCCTG 3'

5' GAGTCGCACTGAAGGGTTACATTACCTCCGAGTTCACCACAGGGCTCGGCTGGGCTGACAGGGTCGGTTAATGTAGGC 3'

5' GTAACCC TTCAGTGCGACTCACAAGTGGCATTTGATGGCTTCTGTGTAAAGAAGGTGAAGATGAACACCCACAATGCCTG 3'

5' GTGACACTGGACCAACTGAAGATGGCGGGGACGAACCACGCGCATGCGGCTGGGAGTTCAGGCATTGTGGGTGTTTCATC 3'

5' CAGTGTGGTCCAGTGTCACCGAGCCGCCGTTGGTGGTACCGTTGCTATGCTTATGACTCGAACTCTCCGTATGAGTGGTC 3'

*HindIII*

5' CCAAAAGCTTATAAGACCAGCAACTCCAGGAGATCACTAGGTAAGACCCTCATACGGAGAGTTC 3'
