# Supplementary material
Source: PubMed Central journal article supplement (PMC166403)

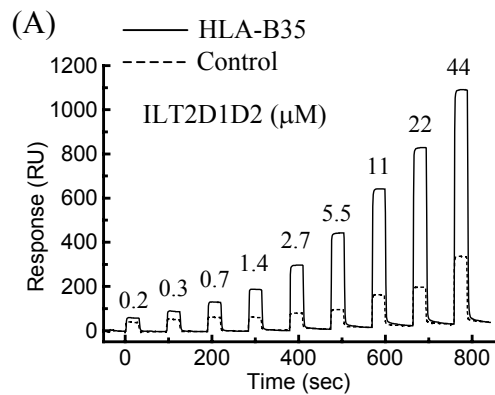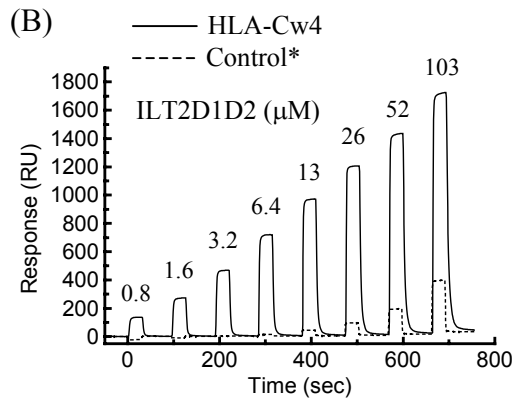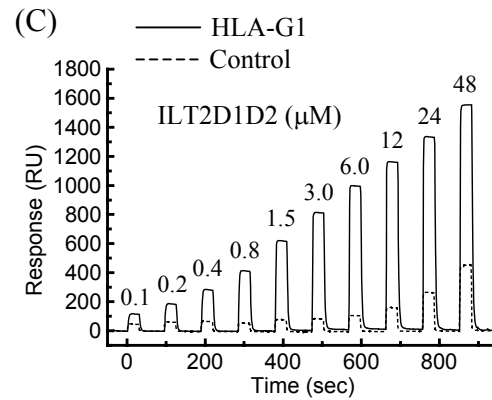

Supplement: pnas_1431057100_4.pdf [file pnas_1431057100_4.pdf]
